# Supplementary material
Source: PubMed Central journal article supplement (PMC4329728)
Supplement: NIHMS279322-supplement-1.pdf [file NIHMS279322-supplement-1.pdf]

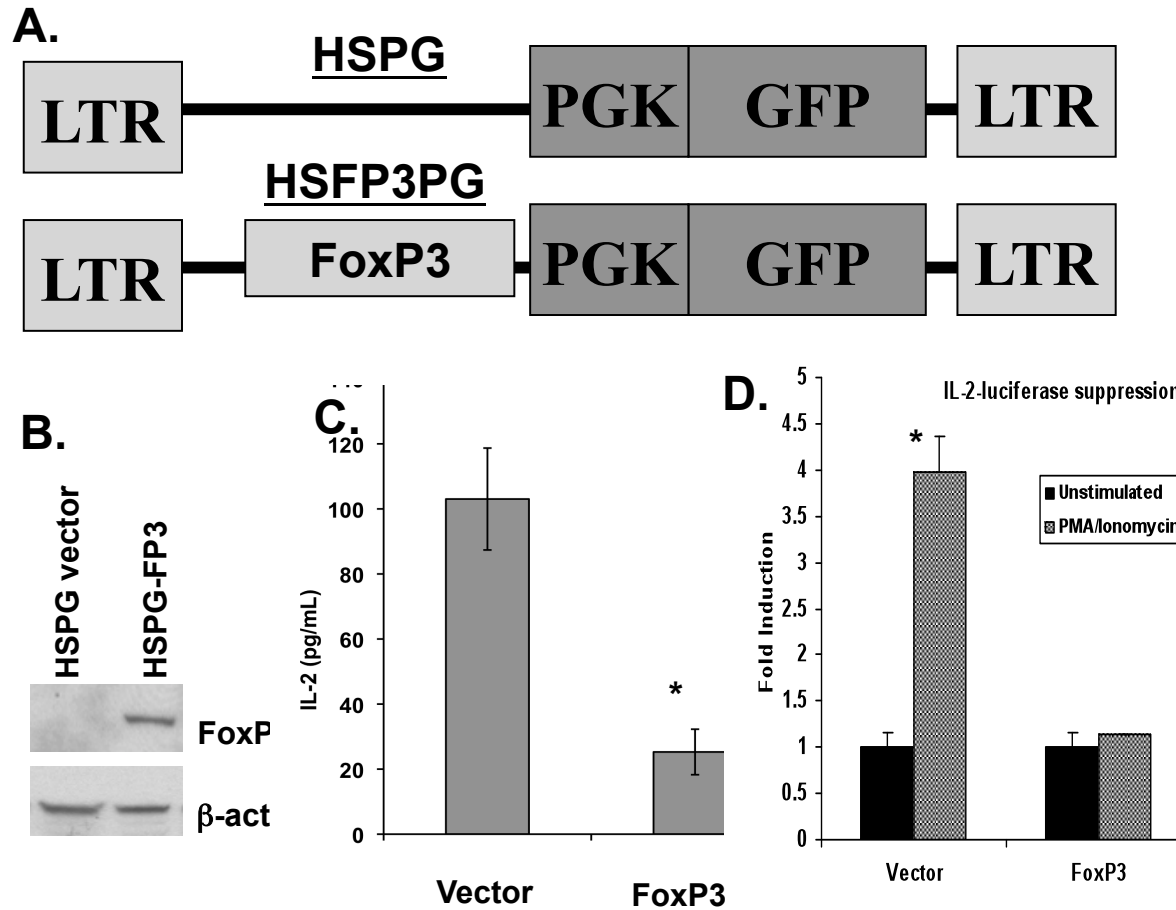

**FIGURE S1. Expression of FoxP3 in Jurkat cells represses IL-2 expression.** (A) Diagram of HSPG retrovirus vectors expressing GFP or FoxP3 and GFP. (B) Western blot analysis of FoxP3 expression in Jurkat cells transduced with HSPG-vector or HSPG-FoxP3. (C) Jurkat cells transduced with FoxP3 were stimulated with PMA and Ionomycin for 16h, and IL-2 expression was analyzed by IL-2 ELISA in supernatants in triplicate. (D) Jurkat T cells were co-transfected with hFP3 and IL2 promoter (-226 to + 45)-luciferase plasmids. Transfected cells were stimulated with PMA and Ionomycin, and IL2 promoter activity was detected by luciferase assay in triplicate. Error bars indicate standard deviation. \*,  $p < 0.05$ .

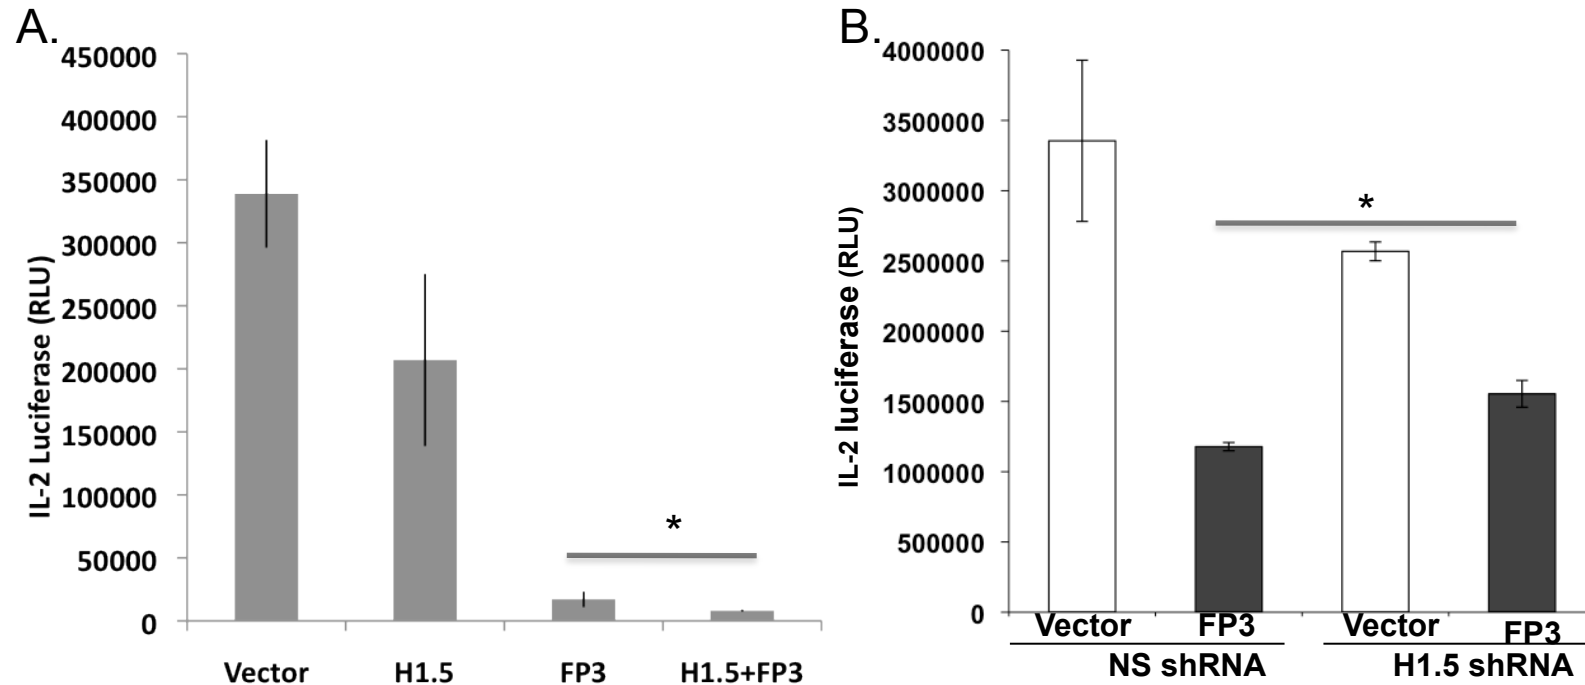

**Figure S2. FoxP3 and H1.5 interact functionally to repress IL2 promoter activity in Jurkat T cells. (A)** FoxP3 and H1.5 cooperate to synergistically repress IL2 promoter expression in human T cells. Jurkat T cells were co-transfected by electroporation with hFP3, flag-H1.5, and IL2 promoter(-226 to + 45)-luciferase plasmids. Transfected cells were stimulated with PMA and Ionomycin, and IL2 promoter activity was detected by luciferase assay in triplicate. **(B)** H1.5 is required for FoxP3-mediated repression of the IL2 promoter in human T cells. Jurkat T cells were co-transfected with hFP3, shRNA and IL2 promoter-luciferase plasmids. Graph shows representative experiment in triplicate. Error bars indicate standard deviation. Data represent results from four separate experiments each in triplicate. Error bars indicate standard error, p-values are determined by one-tailed students' t-test. \*,  $p < 0.05$ .
